# Supplementary material for: A {Cr2Dy4} compressed octahedron: the first sulfate-based single-molecule magnet
Source: Royal Society of Chemistry journal article supplement (doi:10.1039/c2dt32651e), 2012-11-07
Supplement: c2dt32651e.pdf [file c2dt32651e.pdf]

## Supporting Information

### **A {Cr<sub>2</sub>Dy<sub>4</sub>} compressed octahedron: the first sulfate-based single-molecule magnet**

Hua Xiang,<sup>a</sup> Wen-Guan Lu,<sup>\*b</sup> Wei-Xiong Zhang<sup>c</sup> and Long Jiang<sup>c</sup>

<sup>a</sup>*Department of Media and Communication, Guangdong Industry Technical College, Guangzhou 510300, PR China*

<sup>b</sup>*Department of Chemistry, Shaoguan University, Shaoguan 512005, PR China. Fax: (+86) 751-8618726; E-mail:sgulwg@yahoo.com.cn*

<sup>c</sup>*MOE Key Laboratory of Bioinorganic and Synthetic Chemistry / State Key Laboratory of Optoelectronic Materials and Technologies / School of Chemistry and Chemical Engineering, Sun Yat-Sen University, Guangzhou 510275, PR China.*

#### **Detailed Experiment:**

##### **General Remarks**

All the reagents of analytical grade were obtained from commercial sources and used without further purification. Elemental analyses were determined using Elementar Vario EL elemental analyzer. The IR spectra were recorded in the 4000-400 cm<sup>-1</sup> region using KBr pellets and a Bruker EQUINOX 55 spectrometer. Magnetic susceptibility measurements of **1** were performed on finely ground polycrystalline samples dispersed in eicosane and fixed with GE7031 varnish on a Quantum Design MPMS-XL7 SQUID in the temperature range 1.8–300 K and under an applied field of 1000 G. The ac susceptibility measurements were measured with an oscillating ac field of 6 Oe and ac frequencies ranging from 1 to 1500 Hz. The magnetic data were corrected for the sample holder and the diamagnetic contributions.

(pipzH<sub>2</sub>)[Cr<sub>2</sub>Dy<sub>4</sub>(μ<sub>4</sub>-O)<sub>2</sub>(μ<sub>3</sub>-OH)<sub>4</sub>(H<sub>2</sub>O)<sub>10</sub>(μ<sub>3</sub>-SO<sub>4</sub>)<sub>4</sub>(SO<sub>4</sub>)<sub>2</sub>].2H<sub>2</sub>O (**1**): A mixture of Dy(NO<sub>3</sub>)<sub>3</sub>·6H<sub>2</sub>O (0.228 g, 0.50 mmol), Cr(NO<sub>3</sub>)<sub>3</sub>·9H<sub>2</sub>O (0.100 g, 0.25 mmol), Na<sub>2</sub>SO<sub>4</sub> (0.106 g, 0.75 mmol), piperazine (0.086 g, 1.0 mmol), and 10 mL of water was stirred at room temperature for 30 min, then transferred to a 25 mL Teflon-lined stainless steel vessel. The reaction mixture was heated at 170 °C for 3 days under autogenous pressure. After cooled slowly to room temperature, cube-shaped red crystals of **1** were obtained, yield: 0.136 g, 62% based on Dy(NO<sub>3</sub>)<sub>3</sub>.

Found: C 2.86, H 2.23, N 1.45; C<sub>4</sub>H<sub>40</sub>N<sub>2</sub>O<sub>42</sub>S<sub>6</sub>Cr<sub>2</sub>Dy<sub>4</sub> requires C 2.77, H 2.32, N 1.61%.

$\nu_{\max}(\text{KBr})/\text{cm}^{-1}$ : 3384, 1654, 1608, 1436, 1234, 1091, 1051, 987, 644, 597 and 554.

### X-ray Crystallography

X-ray data for **1** were collected on an Agilent Xcalibur Nova CCD diffractometer with graphite monochromatic Mo K $\alpha$  radiation ( $\lambda = 0.71073 \text{ \AA}$ ). Cell refinement and data reduction were applied using the program of CrysAlis PRO. The structure was solved using the direct method, which yielded the positions of all non-hydrogen atoms. These were refined first isotropically and then anisotropically. All the hydrogen atoms of the protonated piperazine were placed in calculated positions with fixed isotropic thermal parameters and included in structure factor calculations in the final stage of full-matrix least-squares refinement. The hydrogen atoms of coordinated water and lattice water molecules, as well as hydroxyl were located in the difference Fourier maps and refined isotropically. All calculations were performed using the SHELXTL-97 system of computer programs.<sup>1</sup>

Selected bond lengths and angles for **1** are shown in Table S1. Crystallographic data

(excluding structure factors) for the structures in this paper have been deposited with the Cambridge Crystallographic Data Centre as supplementary publication nos. CCDC 903427. Copies of the data can be obtained, free of charge, on application to CCDC, 12 Union Road, Cambridge CB2 1EZ, UK: <http://www.ccdc.cam.ac.uk/cgi-bin/catreq.cgi>, e-mail: [data\\_request@ccdc.cam.ac.uk](mailto:data_request@ccdc.cam.ac.uk), or fax: +44 1223 336033.

**Table S1.** Selected bond lengths (Å) and angles (°) for **1**.

|               |            |             |            |               |            |
|---------------|------------|-------------|------------|---------------|------------|
| Cr1—O13       | 1.936(4)   | Dy1—O8      | 2.335(4)   | Dy2—O3        | 2.322(4)   |
| Cr1—O13a      | 1.949(4)   | Dy1—O1a     | 2.337(4)   | Dy2—O13       | 2.343(4)   |
| Cr1—O20       | 1.975(4)   | Dy1—O13a    | 2.363(4)   | Dy2—O9a       | 2.348(4)   |
| Cr1—O14       | 1.977(4)   | Dy1—O11     | 2.375(4)   | Dy2—O3W       | 2.361(5)   |
| Cr1—O12       | 2.019(4)   | Dy1—O2W     | 2.377(4)   | Dy2—O4W       | 2.363(4)   |
| Cr1—O4        | 2.025(4)   | Dy1—O20a    | 2.405(4)   | Dy2—O14       | 2.391(4)   |
|               |            | Dy1—O1W     | 2.422(4)   | Dy2—O5W       | 2.421(4)   |
|               |            | Dy1—O14     | 2.433(4)   | Dy2—O20a      | 2.436(4)   |
| Cr1···Cr1a    | 2.9105(18) | Cr1···Dy2a  | 3.3452(9)  | Dy1···Dy2     | 3.9848(4)  |
| Cr1···Dy2     | 3.3039(9)  | Cr1···Dy1   | 3.3648(9)  | Dy1···Dy2a    | 4.4885(4)  |
| Cr1···Dy1a    | 3.3268(9)  |             |            |               |            |
| Cr1—O13—Cr1a  | 97.06(16)  | Cr1—O14—Dy2 | 97.84(17)  | Cr1—O20—Dy1a  | 98.39(16)  |
| Cr1—O13—Dy2   | 100.68(15) | Cr1—O14—Dy1 | 98.95(17)  | Cr1—O20—Dy2a  | 98.09(17)  |
| Cr1a—O13—Dy2  | 102.04(16) | Dy2—O14—Dy1 | 111.38(16) | Dy1a—O20—Dy2a | 110.80(16) |
| Cr1—O13—Dy1a  | 100.95(16) | Cr1—O14—H14 | 109(9)     | Cr1—O20—H20   | 117(9)     |
| Cr1a—O13—Dy1a | 102.17(15) | Dy2—O14—H14 | 117(9)     | Dy1a—O20—H20  | 126(9)     |
| Dy2—O13—Dy1a  | 145.05(17) | Dy1—O14—H14 | 119(9)     | Dy2a—O20—H20  | 104(9)     |

Symmetry code *a*: -*x*, -*y* + 1, -*z*.

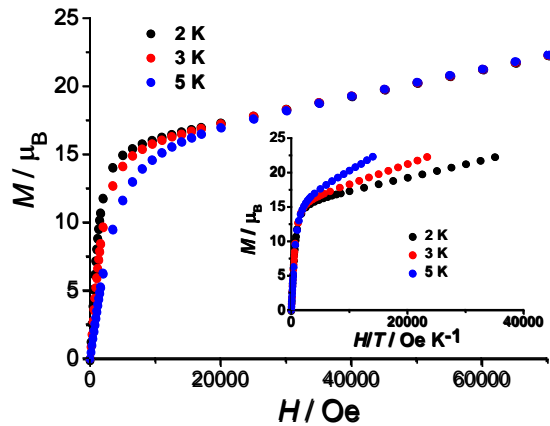

**Fig. S1.** Plots of magnetization *M* vs *H* and *M* vs *H/T* (inset) at 2-5 K for **1**.

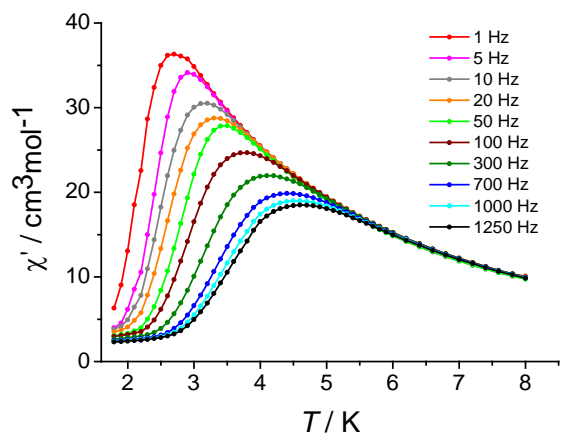

**Fig. S2.** Temperature dependence of the in-phase ( $\chi'$ ) signals at different frequencies for **1** in a 6.0 Oe ac field with no applied dc field.

## References.

1. Sheldrick, G. M. SHELXTL-97, Program for Crystal Structure Solution and Refinement; University of Göttingen: Göttingen: Germany, 1997.
